# Supplementary material for: Properties of young contrails – a parametrisation based on large-eddy simulations
Source: Copernicus journal article supplement (doi:10.5194/acp-16-2059-2016), 2016-02-24
Supplement: Supplementary file [file acp-16-2059-2016-supplement-title-page.pdf › acp-16-2059-2016-supplement-title-page.pdf]

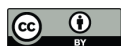

*Supplement of*

## **Properties of young contrails – a parametrisation based on large-eddy simulations**

**Simon Unterstrasser**

*Correspondence to:* S. Unterstrasser ([simon.unterstrasser@dlr.de](mailto:simon.unterstrasser@dlr.de))

- [acp-16-2059-2016-supplement-title-page.pdf](#)
- [contrail\\_properties.f90](#)

The copyright of individual parts of the supplement might differ from the CC-BY 3.0 licence.
